# Supplementary material
Source: PubMed Central journal article supplement (PMC7521382)
Supplement: mmc1.pdf [file mmc1.pdf]

## **Supplemental Information**

### **Translocation of Viable Gut Microbiota**

### **to Mesenteric Adipose Drives**

### **Formation of Creeping Fat in Humans**

**Connie W.Y. Ha, Anthony Martin, Gregory D. Sepich-Poore, Baochen Shi, Yizhou Wang, Kenneth Gouin, Gregory Humphrey, Karenina Sanders, Yasiru Ratnayake, Kelvin S.L. Chan, Gustaf Hendrick, J.R. Caldera, Christian Arias, Jacob E. Moskowitz, Shannan J. Ho Sui, Shaohong Yang, David Underhill, Matthew J. Brady, Simon Knott, Kelly Kaihara, Michael J. Steinbaugh, Huiying Li, Dermot P.B. McGovern, Rob Knight, Phillip Fleshner, and Suzanne Devkota**

**Table S1. CD and UC Patient metadata, related to Figure 1**

|                                                |                          | <b>Crohn's disease (n=11)</b> | <b>Ulcerative colitis (n=13)</b> |  |
|------------------------------------------------|--------------------------|-------------------------------|----------------------------------|--|
| <b>Gender</b>                                  | Male                     | 7                             | 7                                |  |
| <b>Race</b>                                    | European ancestry/Jewish | 3                             | 3                                |  |
|                                                | European ancestry        | 6                             | 7                                |  |
|                                                | Asian                    | 1                             | 0                                |  |
|                                                | Pacific Islander         | 1                             | 0                                |  |
|                                                | Hispanic                 | 0                             | 1                                |  |
|                                                | Other                    | 0                             | 2                                |  |
| <b>Family history of IBD</b>                   | Yes                      | 1                             | 5                                |  |
|                                                | No                       | 10                            | 8                                |  |
| <b>Median age (min. - max.)</b>                |                          | 49 (18-75)                    | 37 (20-72)                       |  |
| <b>Median age at diagnosis (min.- max.)</b>    |                          | 35 (7-60)                     | 26 (11-60)                       |  |
| <b>Median duration of disease (min.- max.)</b> |                          | 15 (9-19)                     | 5 (1-25)                         |  |
| <b>Previous IBD surgery</b>                    | Yes                      | 7                             | 0                                |  |
|                                                | No                       | 4                             | 13                               |  |
| <b>Montreal classification</b>                 | A1                       | 3                             |                                  |  |
|                                                | A2                       | 5                             |                                  |  |
|                                                | A3                       | 3                             |                                  |  |
|                                                | CD†                      | B1                            | 0                                |  |
|                                                |                          | B2                            | 11                               |  |
|                                                |                          | B3                            | 4                                |  |
|                                                | L1                       | 2                             |                                  |  |
|                                                | L2                       | 0                             |                                  |  |
|                                                | L3                       | 9                             |                                  |  |
|                                                | p                        | 1                             |                                  |  |
| <b>UC</b>                                      | E1                       |                               | 0                                |  |
|                                                | E2                       |                               | 1                                |  |
|                                                | E3                       |                               | 12                               |  |
| <b>Indication for surgery</b>                  | Strictures               | 7                             | 0                                |  |
|                                                | Strictures w/ fistulae   | 2                             | 0                                |  |
|                                                | Medically refractory     | 0                             | 13                               |  |
|                                                | Obstruction              | 2                             | 0                                |  |
| <b>Smoker</b>                                  | Never                    | 5                             | 10                               |  |
|                                                | Current                  | 0                             | 0                                |  |
|                                                | Ex-smoker                | 5                             | 3                                |  |
|                                                | N/A                      | 1                             | 0                                |  |
| <b>Medications*</b>                            | Aminosalicylates         | 1                             | 7                                |  |
|                                                | Corticosteroids          | 3                             | 8                                |  |
|                                                | Immunomodulators         | 7                             | 6                                |  |
|                                                | Biologics                | 9                             | 12                               |  |

† Patients may be classified in more than one "B" category

\* Patients could be on more than one class of medication

|                                      |                               |
|--------------------------------------|-------------------------------|
| <b>Montreal Classification: CD</b>   | <b>UC</b>                     |
| A1- below 16 y                       | E1- Ulcerative proctitis      |
| A2- between 17 and 40 y              | E2- Left sided UC (distal UC) |
| A3- above 40 y                       | E3- Extensive UC (pancolitis) |
| L1- ileal                            |                               |
| L2- colonic                          |                               |
| L3- ileocolonic                      |                               |
| B1- non-stricturing, non-penetrating |                               |
| B2- stricturing                      |                               |
| B3- penetrating                      |                               |
| p- perianal disease modifier         |                               |

**Table S2. Metagenomic read counts per sample, related to Figure 2.**

H- MAT = control adipose  
H- MUC = control mucosa  
CD CrF = CD creeping fat  
CD INV MUC = CD involved mucosa  
CD MAT = CD uninvolved adipose  
CD UN MUC = CD uninvolved mucosa

| Sample IDs  | Reads Per Sample<br>(after 0.01% relative abundance filtering and decontamination) |
|-------------|------------------------------------------------------------------------------------|
| H3.MAT      | 0                                                                                  |
| CD4.INV.MUC | 438                                                                                |
| H3.MUC      | 1713                                                                               |
| H1.MUC      | 1807                                                                               |
| H2.MUC      | 2502                                                                               |
| H4.MAT      | 4097                                                                               |
| CD1.MAT     | 4914                                                                               |
| CD1.INV.MUC | 7025                                                                               |
| CD1.CrF     | 7164                                                                               |
| H1.MAT      | 9158                                                                               |
| CD4.CrF     | 9824                                                                               |
| CD3.MAT     | 14714                                                                              |
| CD4.UN.MUC  | 16472                                                                              |
| CD2.MAT     | 18233                                                                              |
| CD4.MAT     | 19741                                                                              |
| H2.MAT      | 21498                                                                              |
| CD1.UN.MUC  | 22158                                                                              |
| CD2.CrF     | 34624                                                                              |
| CD3.CrF     | 337415                                                                             |
| CD3.INV.MUC | 1014248                                                                            |
| CD3.UN.MUC  | 1038967                                                                            |
| CD2.UN.MUC  | 4401798                                                                            |
| CD2.INV.MUC | 17529985                                                                           |
| H4.MUC      | 19680723                                                                           |

**Table S3. Adonis PERMANOVA of beta diversity measures from metagenomic sequencing identifies sample type (tissue source- MAT or mucosa and CD or H) and participant ID (inter-individual differences) as most significant parameters defining bacterial diversity, related to Figure 2.**

|                           | Df | SumsOfSqs  | MeanSqs    | F.Model    | R2         | Pr(>F) |
|---------------------------|----|------------|------------|------------|------------|--------|
| <b>Weighted UniFrac</b>   |    |            |            |            |            |        |
| Sample Type               | 5  | 3.08997458 | 0.61799492 | 2.45866441 | 0.21636313 | 0.02   |
| Participant ID            | 6  | 8.67791511 | 1.44631919 | 5.75411449 | 0.60763634 | 0.001  |
| Residuals                 | 10 | 2.51353912 | 0.25135391 |            | 0.17600054 |        |
| Total                     | 21 | 14.2814288 |            |            |            | 1      |
| <b>Unweighted UniFrac</b> |    |            |            |            |            |        |
| Sample Type               | 5  | 1.48612759 | 0.29722552 | 1.33938695 | 0.23969334 | 0.028  |
| Participant ID            | 6  | 2.49487688 | 0.41581281 | 1.87377673 | 0.40239167 | 0.001  |
| Residuals                 | 10 | 2.21911612 | 0.22191161 |            | 0.35791499 |        |
| Total                     | 21 | 6.20012059 |            |            |            | 1      |

**Table S4. Bacterial isolates recovered from CD and UC mesenteric adipose, related to Figure 3**

---

---

| <b>List of cultivable organism from mesenteric adipose tissue</b>                            |
|----------------------------------------------------------------------------------------------|
| <i>Actinomyces odontolyticus</i>                                                             |
| <i>Alistipes finegoldii</i>                                                                  |
| <i>Arabia massiliensis</i> 94% ( <i>Paraeggerthella</i> 100% by RDP)                         |
| <i>Bacteroides caccae</i>                                                                    |
| <i>Bacteroides cellulosilyticus</i>                                                          |
| <i>Bacteroides fragilis</i>                                                                  |
| <i>Bacteroides ovatus</i>                                                                    |
| <i>Bacteroides thetaiotaomicron</i>                                                          |
| <i>Bacteroides uniformis</i>                                                                 |
| <i>Bacteroides vulgatus</i>                                                                  |
| <i>Bifidobacterium bifidum</i>                                                               |
| <i>Bifidobacterium longum</i>                                                                |
| <i>Bifidobacterium pseudolongum</i>                                                          |
| <i>Bilophila wadsworthia</i>                                                                 |
| <i>Blautia coccoides</i>                                                                     |
| <i>Blautia hansenii</i>                                                                      |
| <i>Blautia obeum</i>                                                                         |
| <i>Blautia</i> sp. KLE 1732 97%                                                              |
| <i>Cetobacterium somerae</i>                                                                 |
| <i>Citrobacter freundii</i>                                                                  |
| <i>Clostridium baratii</i>                                                                   |
| <i>Clostridium bolteae</i>                                                                   |
| <i>Clostridium botulinum</i>                                                                 |
| <i>Clostridium chauvoei</i>                                                                  |
| <i>Clostridium innocuum</i>                                                                  |
| <i>Clostridium perfringens</i>                                                               |
| <i>Clostridium spiroforme</i>                                                                |
| <i>Clostridium symbiosum</i>                                                                 |
| <i>Collinsella aerofaciens</i>                                                               |
| <i>Desulfovibrio desulfuricans</i>                                                           |
| <i>Dorea longicatena</i>                                                                     |
| <i>Eggerthella lenta</i>                                                                     |
| <i>Eisenbergiella tayi</i>                                                                   |
| <i>Enterococcus faecalis</i>                                                                 |
| <i>Enterococcus gilvus</i>                                                                   |
| <i>Enterococcus hermanniensis</i>                                                            |
| <i>Erysipelatoclostridium ramosum</i>                                                        |
| <i>Erysipelotrichaceae</i> 97% <i>Coprobacillus</i> 90%                                      |
| <i>Escherichia/Shigella</i>                                                                  |
| <i>Eubacterium oxidoreducens</i>                                                             |
| <i>Eubacterium</i> sp. Marseille (BLAST:98%)/Unclassified <i>Lachnospiraceae</i> (RDP: 100%) |
| <i>Faecalicatena contorta</i>                                                                |
| <i>Flavonifractor plautii</i>                                                                |
| <i>Fusobacterium nucleatum</i>                                                               |
| <i>Fusobacterium ulcerans</i>                                                                |
| <i>Gardnerella vaginalis</i>                                                                 |
| <i>Gemella sanguinis</i>                                                                     |
| <i>Haemophilus parainfluenzae</i>                                                            |
| <i>Hungatella hathewayi</i>                                                                  |
| <i>Klebsiella oxytoca</i>                                                                    |
| <i>Klebsiella pneumoniae</i>                                                                 |
| <i>Klebsiella</i> spp.                                                                       |
| <i>Lachnoclostridium</i> sp.                                                                 |
| <i>Lactobacillus gasseri</i>                                                                 |
| <i>Lactobacillus rhamnosus</i> GG                                                            |
| <i>Massiliomicrobiota timonensis</i>                                                         |
| <i>Massiliomicrobiota timonensis</i>                                                         |
| <i>Merdimonas faecis</i> 95% (Unclassified <i>Lachnospiraceae</i> )                          |
| <i>Morganella morganii</i>                                                                   |
| <i>Oscillibacter ruminantium</i>                                                             |
| <i>Parabacteroides distasonis</i>                                                            |
| <i>Parabacteroides johnsonii</i>                                                             |
| <i>Parabacteroides merdae</i>                                                                |
| <i>Parvimonas</i> sp.                                                                        |
| <i>Phascolarctobacterium</i> 100%; <i>Phascolarctobacterium succinatutens</i> YIT 12067 91%  |
| <i>Proteus mirabilis</i>                                                                     |
| <i>Rothia mucilaginosa</i>                                                                   |
| <i>Ruminococcus gnavus</i>                                                                   |
| <i>Ruminococcus torques</i>                                                                  |
| <i>Staphylococcus capitis</i>                                                                |
| <i>Staphylococcus epidermidis</i>                                                            |
| <i>Staphylococcus haemolyticus</i>                                                           |
| <i>Staphylococcus saccharolyticus</i>                                                        |
| <i>Streptococcus anginosus</i>                                                               |
| <i>Streptococcus australis</i>                                                               |
| <i>Streptococcus lutetiensis</i>                                                             |
| <i>Streptococcus parasanguinis</i>                                                           |
| <i>Streptococcus sanguinis</i>                                                               |
| <i>Tyzzerella nexilis</i>                                                                    |
| Unclassified <i>Enterococcus</i>                                                             |
| Unclassified <i>Erysipelotrichaceae</i>                                                      |
| <i>Veillonella atypica</i>                                                                   |
| <i>Veillonella parvula</i>                                                                   |

---

**Table S9. Primers used in the study, related to Key Resources Table in STAR Methods**

| Target gene                                             | Primers                       | Reference                     |                       |
|---------------------------------------------------------|-------------------------------|-------------------------------|-----------------------|
| Bacterial 16S (full length)                             | 27F: AGAGTTTGATCMTGGCTCAG     | 1492R: TACGGYTACCTTGTTACGACTT | Macrogen              |
| Bacterial 16S (V4 region)                               | 515F: GTGYCAGCMGCCGCGGTAA     | 806R: GGACTACNVGGGTWTCTAAT    | Walters et al., 2016  |
| Fungal ITS (full length)                                | ITS1: TCCGTAGGTGAACCTGCGG     | ITS4: TCCTCCGCTTATTGATATGC    | White et al., 1990    |
| Fungal ITS (ITS1 region)                                | ITS1F: CTTGGTCAATTTAGAGGAAGTA | ITS2: GCTGCGTTCTTCATCGATGC    | White et al., 1990    |
| Human GAPDH                                             | F: CTCTGCTCCTCTGTTTCGAC       | R: TTAAAAGCAGCCCTGGTGAC       | Maeß et al., 2010     |
| Human Claudin3                                          | F: CACGCGAGAAGAAGTACACG       | R: CCTGCGTCTGTCCCTTAGAC       | Yao et al., 2015      |
| Human Claudin4                                          | F: CATCTCCTCTGTTCCGGGTA       | R: ATCCACTCTGCACCTCCAG        | This study            |
| Human Claudin7                                          | F: GCAAAAATGTACGACTCGGTG      | R: CACAAACATGCCAGGAAG         | This study            |
| Human E-cadherin                                        | F: GCCGAGAGCTACACGTTTCC       | R: GTCGAGGGAAAAATAGGCTG       | Gleeson et al., 2020  |
| Human Junctional adhesion molecule-A                    | F: TCATATTGGCGATCCTGTTG       | R: AGGCACAGGACAACCTCACCA      | Gleeson et al., 2020  |
| Human Zonula occludens-1                                | F: ACAGCAATGGAGGAAACAGC       | R: CCCCACTCTGAAAATGAGGA       | Gleeson et al., 2020  |
| Human Mucin-1                                           | F: CCCTCCCAGTGTGCAAAATAAG     | R: GAACGGTGTCTGCGAAAACAG      | This study            |
| Human Tricellulin                                       | F: GGCAGCTCGGAGACATAGAG       | R: TTTGCTGTTCTCAGTTCCCTGA     | This study            |
| Human RPL37A                                            | F: ATTGAAATCAGCCAGCAGCG       | R: AGGAACCACAGTGCCAGATCC      | Koeber et al., 2010   |
| Human CD80                                              | F: CTCTTGGTGTCTGGCTGGTCTTT    | R: GCCAGTAGATGCGAGTTTGTGC     | Kooreman et al., 2017 |
| Human CD86                                              | F: CCATCAGCTTGTCTGTTTCATTCC   | R: GCTGTAATCCAAGGAATGTGGTC    | Kooreman et al., 2017 |
| Human CD163                                             | F: GTCGCTCATCCCGTCAGTCATC     | R: GCCGCTGTCTCTGTCTTCGC       | Wheeler et al., 2018  |
| Human CD206                                             | F: ACCTCACAAGTATCCACACCATC    | R: CTTTCATCACCACACAATCCTC     | Wheeler et al., 2018  |
| Human TNF-α                                             | F: ATGAGCACTGAAAGCATGATCC     | R: GAGGGCTGATTAGAGAGAGGTC     | Cappon et al., 2010   |
| Human β-Actin                                           | F: ATTGCCGACAGGATGCAGAA       | R: GCTGATCCACATCTGCTGGAA      | Maeß et al., 2010     |
| Human Collagen I                                        | F: GTCACCCACCGACCAAGAAACC     | R: AAGTCCAGGCTGTCCAGGGATG     | Ekwueme et al., 2016  |
| Human Hyaluronan synthase I                             | F: TCAGCCCAAGATTCTTCAGTC      | R: GAACGAGGAGAAAGCAGGAC       | Zhang et al., 2009    |
| Murine Hprt1                                            | F: AGCCTAAGATGAGCGCAAGT       | R: TTACTAGGCAGATGGCCACA       | Arimochi et al., 2016 |
| Murine Fatty acid binding protein 4                     | F: GAATTCGATGAAATCACCGCA      | R: CTCITTTATTGTGGTCGACTTTCCA  | Arimochi et al., 2016 |
| Murine Peroxisome proliferator activated receptor gamma | F: GTGCCAGTTTCGATCCGTAG       | R: GGCCAGCATCGTGTAGATGA       | Arimochi et al., 2016 |
| Murine Adiponectin                                      | F: GCACTGGCAAGTTCTACTGCAA     | R: GTAGGTGAAGAGAACGGCCTTGT    | Arimochi et al., 2016 |
| Murine CCAAT/enhancer-binding protein alpha             | F: CAAGAACAGCAACGAGTACCG      | R: GTCAGTGGTCAACTCCAGCAC      | Arimochi et al., 2016 |
| Murine Fatty acid synthase                              | F: AGAGATCCCAGAGCGTTCT        | R: GCCTGGTAGGCATTCTGTAGT      | Alcala et al., 2017   |
| Murine Collagen IV                                      | F: TTAAAGGACTCCAGGGACCAC      | R: CCCACTGAGCCTGTACAC         | Alcala et al., 2017   |
| Murine Collagen VI                                      | F: TCTTGAACGTGTGGCTAACC       | R: TCTTTCTCCAGAAGAACCAGG      | Pan et al., 2013      |
